# Supplementary material for: Lack of Vertical Transmission of Severe Acute Respiratory Syndrome Coronavirus 2, China
Source: PubMed Central journal article supplement (PMC7258467; doi:10.3201/eid2606.200287), 2020-06
Supplement: 20-0287-Techapp-s1.pdf [file 20-0287-Techapp-s1.pdf]

# Lack of Vertical Transmission of Severe Acute Respiratory Syndrome Coronavirus 2, China

## Appendix

**Appendix Table 1.** Laboratory test results for a severe acute respiratory syndrome coronavirus 2–infected pregnant woman during hospitalization, China, February 2020\*

| Laboratory result (reference range)                | Illness day 3, hospital day 1 | Illness day 4, hospital day 2 | Illness day 5, hospital day 3 | Illness day 6, hospital day 4 | Illness day 7, hospital day 5 |
|----------------------------------------------------|-------------------------------|-------------------------------|-------------------------------|-------------------------------|-------------------------------|
| Leukocytes, × 10 <sup>9</sup> cells/L (4.0–10.0)   | 8.7                           | 7.2                           | 8.4                           | 22.9                          | 19.9                          |
| Neutrophils, × 10 <sup>9</sup> cells/L (2.0–7.0)   | 7.1                           | 5.3                           | 6.9                           | 20.2                          | 17.9                          |
| Lymphocytes, × 10 <sup>9</sup> cells/L (0.8–4.0)   | 1.1                           | 1.4                           | 1.4                           | 1.9                           | 1.5                           |
| Platelets, × 10 <sup>9</sup> cells/L (101.0–320.0) | 96                            | 91                            | 92                            | 108                           | 141                           |
| Haemoglobin, g/dL (113.0–151.0)                    | 114                           | 102                           | 106                           | 98                            | 101                           |
| Prothrombin time (10.0–13.5)                       | 10.9                          | –                             | 11.2                          | 10.6                          | 10.4                          |
| D-dimer, µg/L (0.0–700.0)                          | 3139                          | –                             | –                             | 4784                          | 1836                          |
| Urea, mmol/L (2.6–7.5)                             | –                             | 3.95                          | 3.1                           | 2.84                          | 4.34                          |
| Creatinine, µmol/L (41.0–73.0)                     | –                             | 55                            | 48                            | 49                            | 39                            |
| Bilirubin, µmol/L (0.0–21.0)                       | –                             | 11                            | 8.4                           | 3.9                           | 5.2                           |
| ALT, U/L (5.0–40.0)                                | –                             | 15                            | 9                             | 11                            | 18                            |
| AST, U/L (8.0–40.0)                                | –                             | 19                            | 16                            | 20                            | 18                            |
| CK, U/L (38.0–174.0)                               | –                             | –                             | –                             | 62                            | 46                            |
| CRP, mg/L (0.0–8.0)                                | –                             | –                             | 18.59                         | 14.4                          | 11.17                         |
| Lactic acid, mmol/L (0.5–1.6)                      | –                             | 1.4                           | 0.9                           | 1.5                           | 1.9                           |
| IL-2, pg/mL (0–4.13)                               | –                             | 0.95                          | –                             | 0.95                          | –                             |
| IL-6, pg/mL (0–6.61)                               | –                             | 21.93                         | –                             | 28.48                         | –                             |
| IL-10, pg/mL (0–2.31)                              | –                             | 2.08                          | –                             | 1.19                          | –                             |
| TNF-α, pg/mL (0–33.27)                             | –                             | 6.55                          | –                             | 6.55                          | –                             |
| IFN-γ, pg/mL (0–20.06)                             | –                             | 7.35                          | –                             | 2.41                          | –                             |

\*ALT, alanine aminotransferase; AST, aspartate aminotransferase; CK, creatine kinase; CRP, C-reactive protein; IFN, interferon; IL, interleukin; TNF, tumor necrosis factor; –, not available.

**Appendix Table 2.** Results of real-time reverse transcription PCR for SARS-CoV-2 in a pregnant woman during hospitalization and in her infant immediately after birth, China, February 2020\*

| Specimen             | Mother        |                          |                          |               |               | Infant |       |
|----------------------|---------------|--------------------------|--------------------------|---------------|---------------|--------|-------|
|                      | Illness day 3 | Illness day 4            | Illness day 5            | Illness day 6 | Illness day 7 | Day 1  | Day 2 |
| Sputum               | Pos           | Pos, C <sub>t</sub> 30.9 | Pos, C <sub>t</sub> 36.8 | Pos           | Pos           | NT     | NT    |
| Serum                | NT            | Neg                      | Neg                      | Neg           | Neg           | Neg    | Neg   |
| Urine                | NT            | Neg                      | Neg                      | Neg           | Neg           | Neg    | Neg   |
| Stool                | NT            | Neg                      | NT                       | NT            | NT            | Neg    | Neg   |
| Amniotic fluid       | NT            | NT                       | Neg                      | NT            | NT            | NA     | NA    |
| Umbilical cord blood | NT            | NT                       | Neg                      | NT            | NT            | NA     | NA    |
| Placenta             | NT            | NT                       | Neg                      | NT            | NT            | NA     | NA    |
| Breast milk          | NT            | NT                       | Neg                      | Neg           | Neg           | NA     | NA    |

\*C<sub>t</sub>, cycle threshold; NA, not available; neg, negative test result for SARS-CoV-2; NT, not tested; pos, positive result for SARS-CoV-2. SARS-CoV-2, severe acute respiratory syndrome coronavirus 2.
